# Supplementary material for: Invertases in Phytophthora infestans Localize to Haustoria and Are Programmed for Infection-Specific Expression
Source: PubMed Central journal article supplement (PMC7554665; doi:10.1128/mbio.01251-20), 2020-10-13
Supplement: mBio.01251-20-sf008.pdf [file mBio.01251-20-sf008.pdf]

```
>PITG_12551 INF1
MNFRALFAATVAALVGSTSATTCTTSQQTVAAYVALVSILSDTSFNQCSTDSGYSMLTATSLPTT

>PITG_00375 HMP1
MVLRAVRLIVQASLLLQVLQCGASVTGAQVNNFENTELTSNDKLGTVAPADIPSSQDENLKKQ

>PITG_14238 INVERTASE
MKVIPSIMAFSALVAALVFSPENAHAAIVEAEPGTELF EQFRPVYHFVAREKWMNDPCAPYYDE

>PITG_21410 INF4
MNFVALIAVTVAVLVGSTNAACTAKQQTAAAYNTLVSLLSEASFSTCSKDSGYSMITSKTLPRP

>PITG_22926 RXLR
MLRSFLLIVATVSLFGQCKPLPLATSPVSDAVRAPHRSTHETRFLRTNDEERGATMTLAGVLRD

>PITG_01029 Pectinesterase
MQIFAPLVALASLAAASEGACTGTNARTTPPPGAIVIDATGAYSGSFKTVSEGVANLPKTAVQQ
```

**Fig. S8. N-terminal regions of proteins mentioned in this paper.** Displayed are the first 64 amino acids of the INF1 (PITG\_12251), HMP1 (PITG\_00375), and invertase (PITG\_14238) proteins. Grey shading indicates the signal peptides predicted by TargetP 2.0 (28). The regions used in tdTomato fusions involving INF1 and HMP1 are underlined. PITG\_21410, PITG\_22926, PITG\_01029, and PITG\_14371 are the secreted INF4, pectinesterase, and RXLR proteins shown in other studies to concentrate near haustoria (27). Sequences C-terminal of the signal peptide are dissimilar in chemical features such as hydropathy, ranging from moderately hydrophilic to hydrophobic, and lack conserved motifs based on alignments and motif discovery programs.
