# Supplementary material for: Invertases in Phytophthora infestans Localize to Haustoria and Are Programmed for Infection-Specific Expression
Source: PubMed Central journal article supplement (PMC7554665; doi:10.1128/mbio.01251-20), 2020-10-13
Supplement: mBio.01251-20-st002.pdf [file mBio.01251-20-st002.pdf]

**Table S2. Sources of genome data**

| Species                               | Source (Genbank unless specified otherwise)          |
|---------------------------------------|------------------------------------------------------|
| <i>Achlya hypogyna</i>                | GCA_002081595.1                                      |
| <i>Albugo candida</i>                 | GCA_001078535.1                                      |
| <i>Albugo laibachii</i>               | GCA_902706625.1                                      |
| <i>Aphanomyces astaci</i>             | GCA_000520075.1                                      |
| <i>Aphanomyces invadans</i>           | GCA_000520115.1, GCA_003546525.1                     |
| <i>Aphanomyces stellatus</i>          | GCA_009835185.1, GCA_900243725.1,<br>GCA_900708865.1 |
| <i>Bremia lactucae</i>                | GCA_004359215.1                                      |
| <i>Hyaloperonospora arabidopsidis</i> | GCA_000173235.2                                      |
| <i>Lagenidium giganteum</i>           | GCA_002286825.1                                      |
| <i>Nothophytophthora</i>              | GCA_001712635.2                                      |
| <i>Paralagenidium karlingii</i>       | GCA_002980415.1                                      |
| <i>Peronospora effusa</i>             | GCA_003843895.1                                      |
| <i>Phytophthora capsici</i>           | GCA_000325885.1                                      |
| <i>Phytophthora cinnamomi</i>         | Joint Genome Institute (CBS 144.22)                  |
| <i>Phytophthora infestans</i>         | GCA_000142945.1 and (17)                             |
| <i>Phytophthora palmivora</i>         | GCA_002911725.1                                      |
| <i>Phytophthora parasitica</i>        | GCA_000247585.2                                      |
| <i>Phytophthora ramorum</i>           | GCA_000149735.1                                      |
| <i>Phytophthora sojae</i>             | GCA_000149755.2                                      |
| <i>Phytopythium vexans</i>            | GCA_000387545.2, GCA_003413675.1                     |
| <i>Pilasporangium sp.</i>             | GCA_001600495.1                                      |
| <i>Plasmopara halstedii</i>           | GCA_900000015.1                                      |
| <i>Plasmopara viticola</i>            | GCA_001695595.3                                      |
| <i>Pythium aphanidermatum</i>         | GCA_000387445.2                                      |
| <i>Pythium arrhenomanes</i>           | GCA_000387505.2                                      |
| <i>Pythium insidiosum</i>             | GCA_001029375.1, GCA_000764265.1                     |
| <i>Pythium irregulare</i>             | GCA_000387425.2                                      |
| <i>Pythium iwayamai</i>               | GCA_000387465.2                                      |
| <i>Pythium oligandrum</i>             | GCA_005966545.1, GCA_001573145.1                     |
| <i>Pythium splendens</i>              | GCA_006386115.1                                      |
| <i>Pythium ultimum</i>                | GCA_000143045.1                                      |
| <i>Salisapilia sapeloensis</i>        | PRJNA487262                                          |
| <i>Saprolegnia diclina</i>            | GCA_000281045.1                                      |
| <i>Saprolegnia parasitica</i>         | GCA_000151545.2                                      |
| <i>Thraustotheca clavata</i>          | GCA_002081575.1                                      |
